# Supplementary material for: National Trends in Total Hip Arthroplasty Bearing Surface Usage in Extremely Young Patients Between 2006 and 2016
Source: PubMed Central journal article supplement (PMC8283017; doi:10.1016/j.artd.2021.05.017), 2021-07-09
Supplement: mmc7.pdf [file mmc7.pdf]

# CONFLICT OF INTEREST STATEMENT

## *American Association of Hip and Knee Surgeons*

(Adopted from the American Academy of Orthopaedic Surgeons disclosure statement)

The following form **must be filled out completely and submitted by each author (example, 6 authors, 6 forms).**  
**All items require a response. If there is no relevant disclosure for a given item, enter "None."**

National Trends in Total Hip Arthroplasty Bearing Surface Usage in Extremely Young Patients Between 2006 and 2016

---

Manuscript Title

1. Royalties from a company or supplier: None
2. Speakers bureau/paid presentations for a company or supplier: None
- 3A. Paid employee for a company or supplier: None
- 3B. Paid consultant for a company or supplier: None
- 3C. Unpaid consultants for a company or supplier: None
4. Stock or stock options in a company or supplier: Imagen Technologies
5. Research support from a company or supplier as a Principal Investigator: None
6. Other financial or material support from a company or supplier: None
7. Royalties, financial or material support from publishers: None
8. Medical/Orthopaedic publications editorial/governing board: Journal of Haemophilia, Editorial Board. Journal of Children Orthopaedics, Editorial Board.
9. Board member/committee appointments for a society: None

**Each author must sign AND print or type his/her name, date and submit a separate form**

In addition, one BLINDED Conflict of Interest form (no author names used) should be submitted per manuscript with all author disclosures.

Mauricio Silva, MD

Author Name (Print or Type)

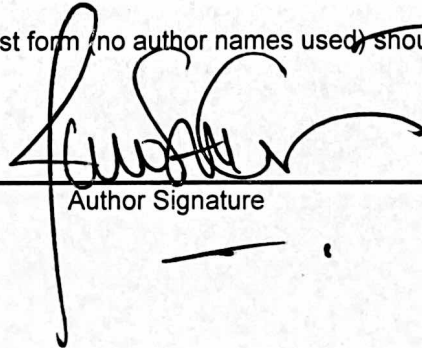

Author Signature

2/10/2021

Date
